# Supplementary material for: Propensity score matching/reweighting analysis comparing intravenous golimumab to infliximab for ankylosing spondylitis using data from the GO-ALIVE and ASSERT trials
Source: PubMed Central journal article supplement (PMC7497341; doi:10.1007/s10067-020-05051-1), 2020-05-04

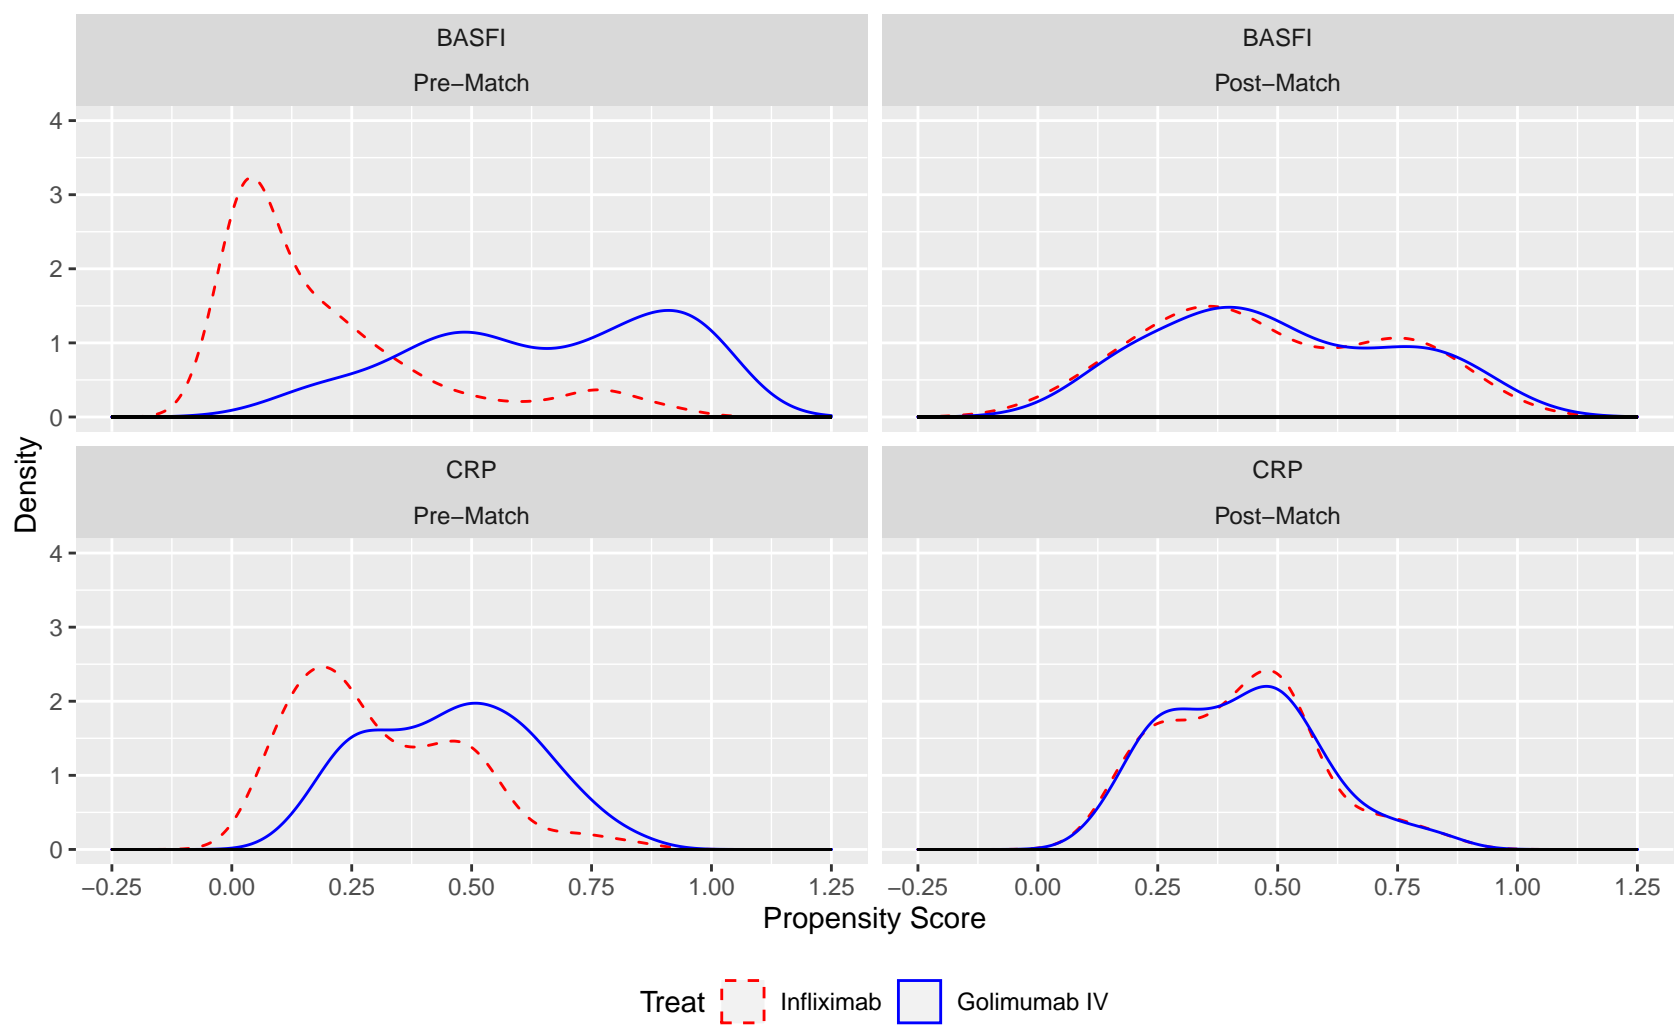

Supplement: 10067_2020_5051_MOESM2_ESM.pdf [file 10067_2020_5051_MOESM2_ESM.pdf]
